# Supplementary material for: Implementing team-based primary care models: a mixed-methods comparative case study in a large, integrated health care system
Source: Springer Nature journal article supplement (doi:10.1007/s11606-018-4611-7), 2018-08-06
Supplement: MOESM4 [file 16012646]

**Observation Template**

**Site#:**

**Date:**

**Consider: Where? When? How Often?**

**Interactions: Consider mindfulness, trust, mutual respect, social/task talk, diversity of mental model**

**Lobby and Waiting Areas**

e.g. physical surroundings/patient comfort, check-in process, patient privacy, wait time, process for rooming (pager, name called etc.), geography in relation to clinical area

Reflections? Surprises? Disruptions?

**Clinical Area**

e.g., accessibility to lobby/waiting areas, general lay out (number of exam rooms, work stations), geography in relation to surrounding clinical areas (embedded vs. separate)

Reflections? Surprises? Disruptions?

**Provider Visit Schedule**

e.g., complexity of patient panel/health literacy of patient panel, how many appointment slots, physicals vs. follow-ups, new vs. established, pediatric vs. adult

Reflections? Surprises? Disruptions?

**Staffing**

e.g., who are the “team players” (i.e. MD, LPN, MA etc.), do players have additional duties, tasks, etc. in addition to team responsibilities

Reflections? Surprises? Disruptions?

**Workflow**

e.g., rooming process, hand-off process, communication details, actual office visit workflow (in exam room)

Reflections? Surprises? Disruptions?

**Provider Patient Relationship**

e.g., observe office visit, patient and MD interviews

Reflections? Surprises? Disruptions?

**Medical Assistant Patient Relationship**

e.g., observe office visit, patient and MA interviews

Reflections? Surprises? Disruptions?

**Team Relationships**

e.g., relationship among team players, relationship among team players and other clinical staff, care coordinator involvement, patient, MA and MD interviews

Reflections? Surprises? Disruptions?

**Need for Flexibility**

e.g., add-on appointments? urgent appointments? emergency situations?

Reflections? Surprises? Disruptions?

**Time Pressure**

e.g., on-time? patient wait time in room

Reflections? Surprises? Disruptions?

**Discharge Process**

e.g., who and where, patient clarity of understanding

Reflections? Surprises? Disruptions?

**Post Visit Work**

e.g., who is responsible, additional resources to assist with after visit work

Reflections? Surprises? Disruptions?

**Electronic Medical Record**

Reflections? Surprises? Disruptions?

**Team Care Model and Provider Burnout**

e.g., Informal and formal interviews

Reflections? Surprises? Disruptions?
